# Supplementary material for: A primary hierarchically organized patient-derived model enables in depth interrogation of stemness driven by the coding and non-coding genome
Source: PubMed Central journal article supplement (PMC9613464; doi:10.1038/s41375-022-01697-9), 2022-09-21

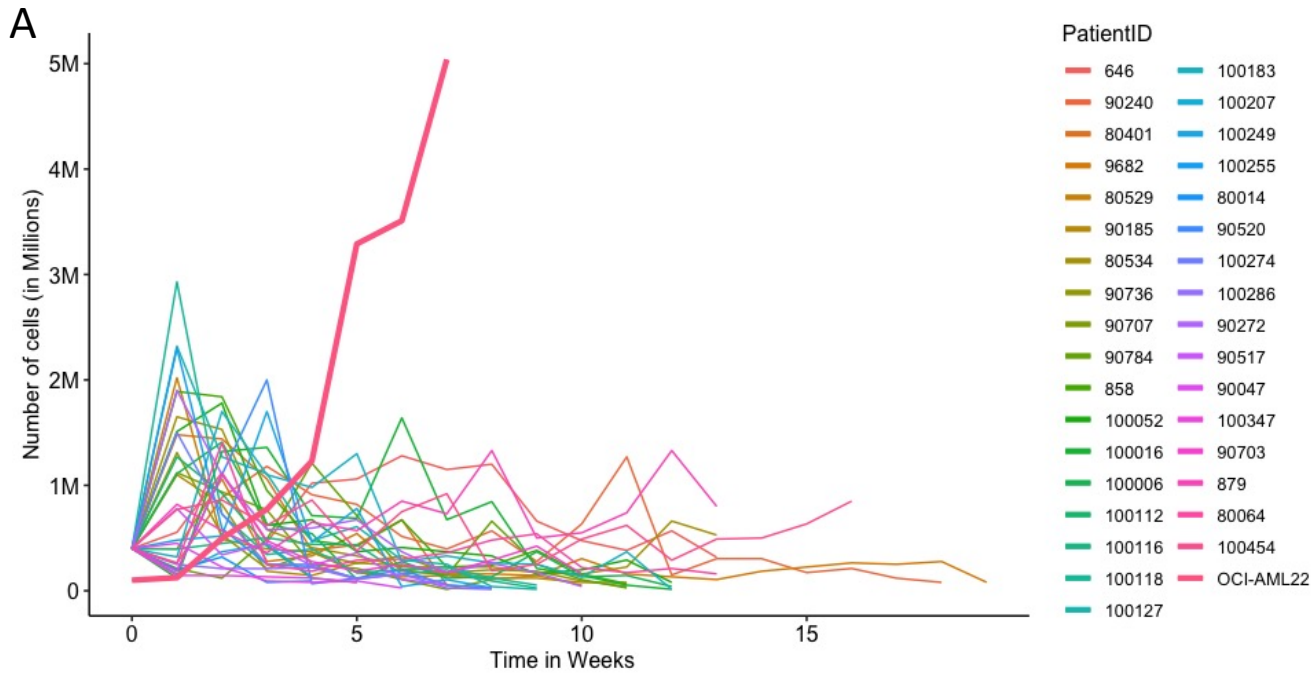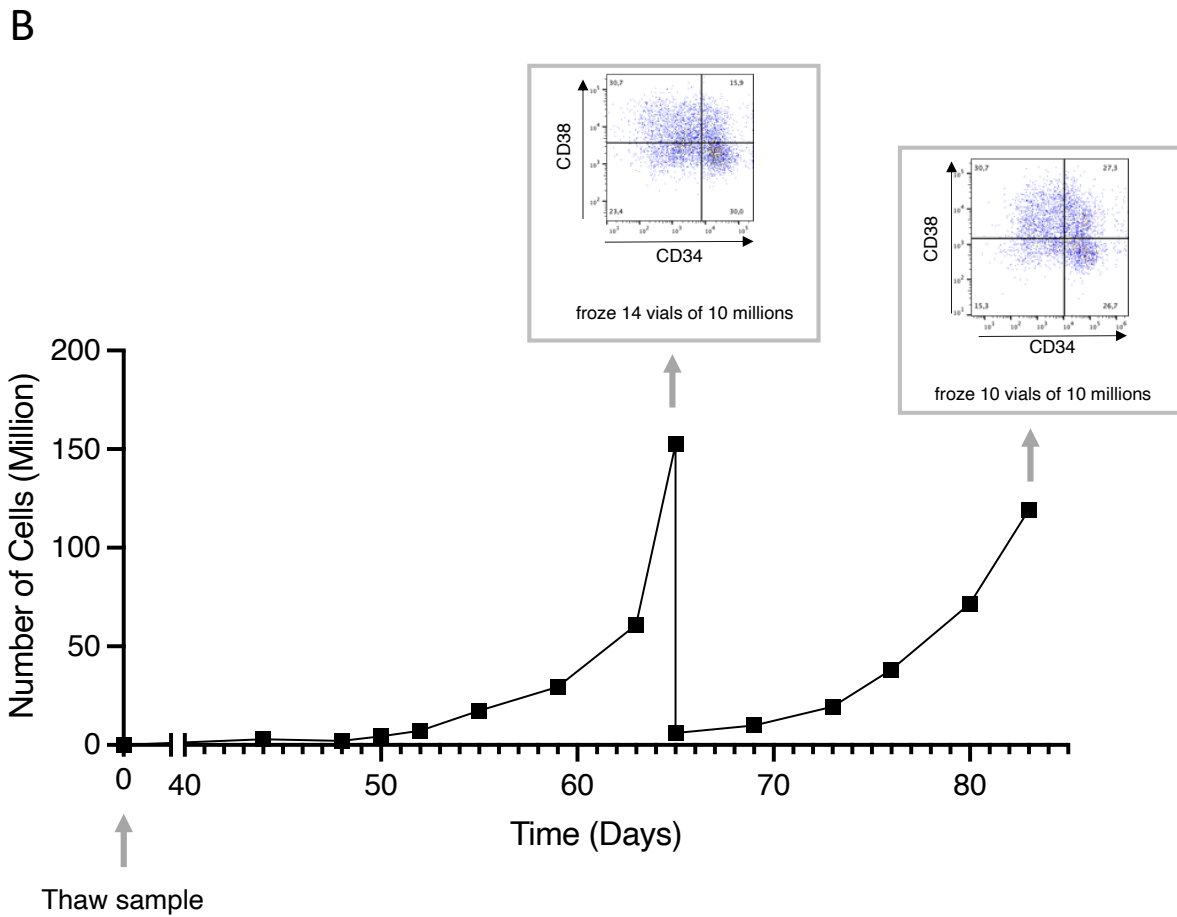

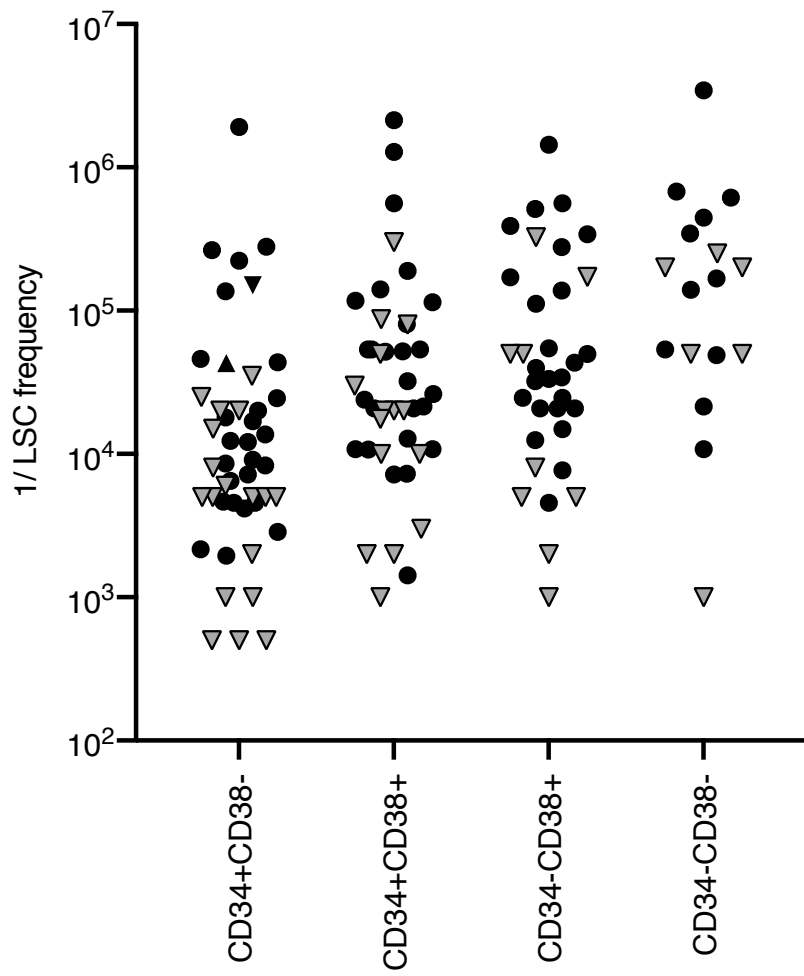

A

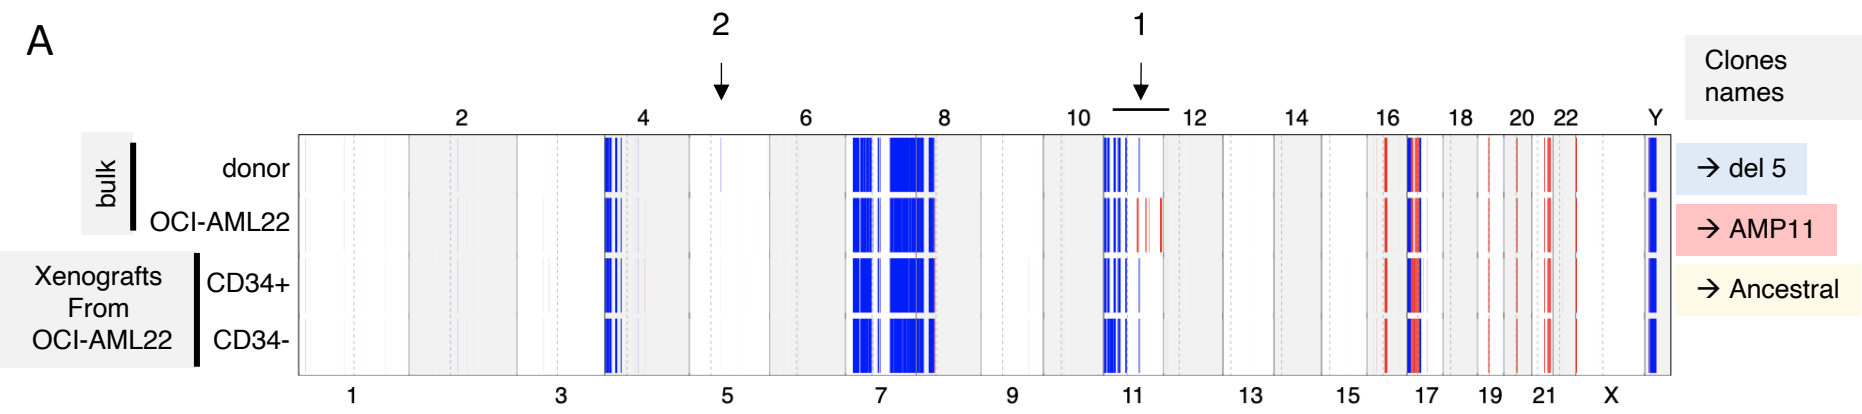

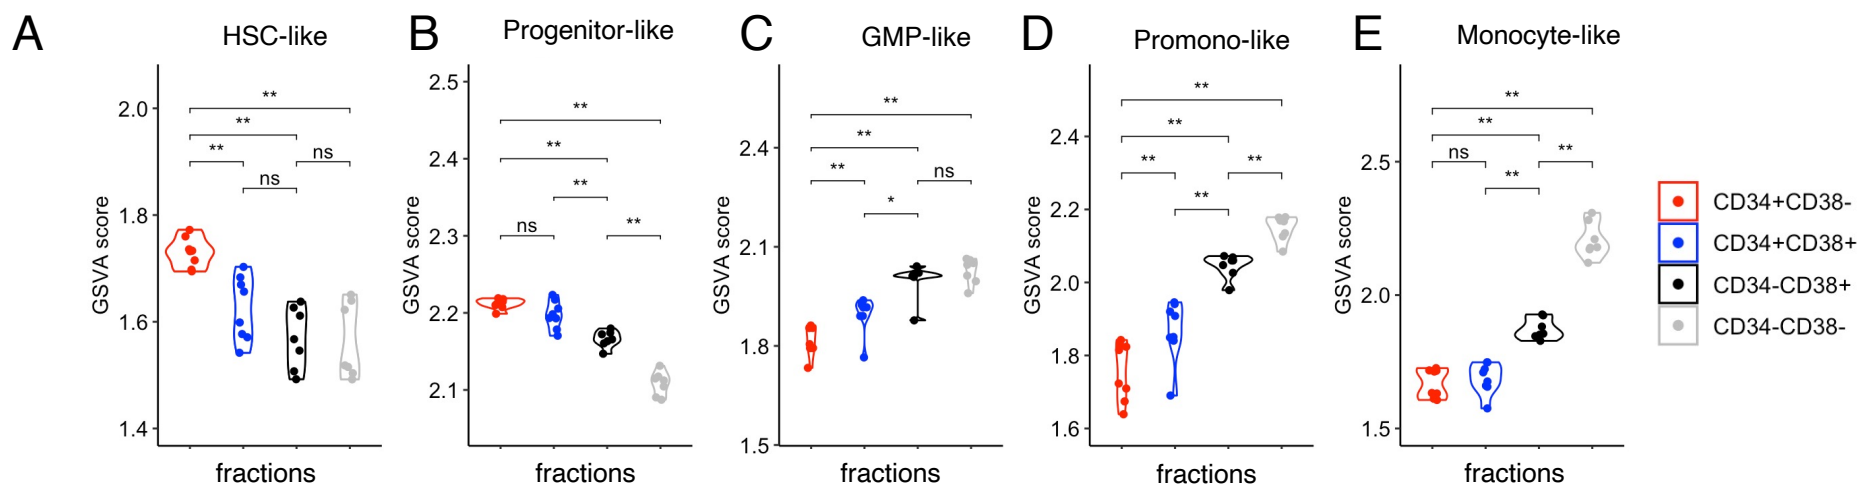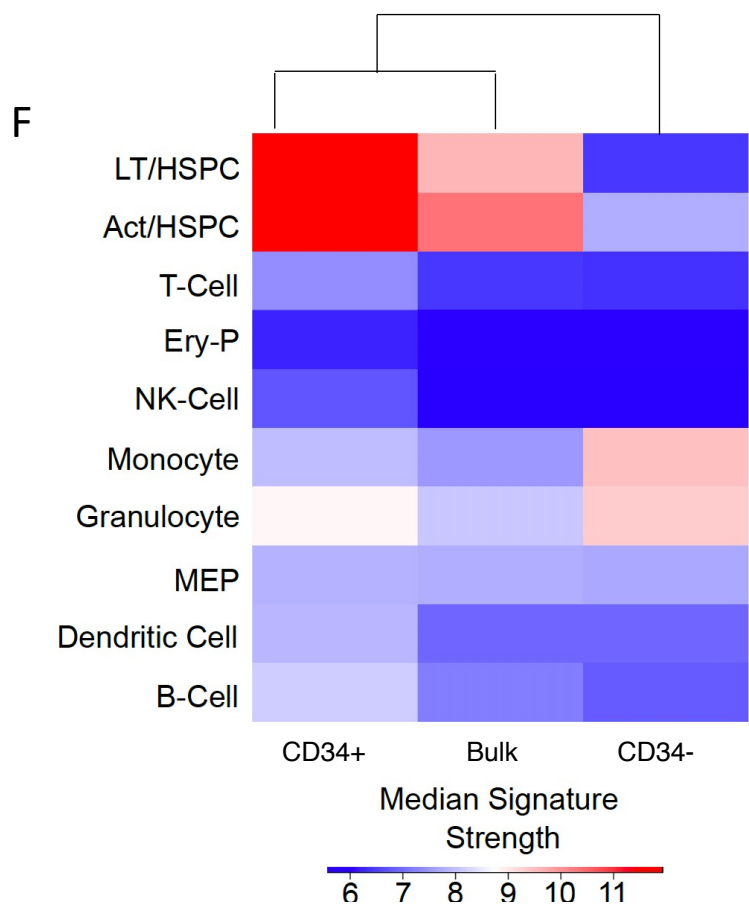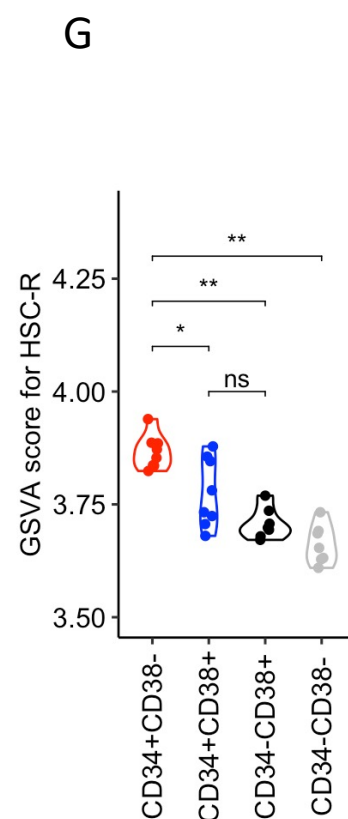

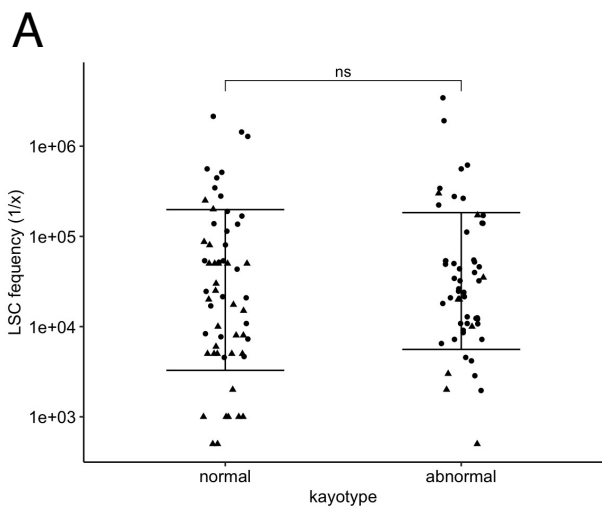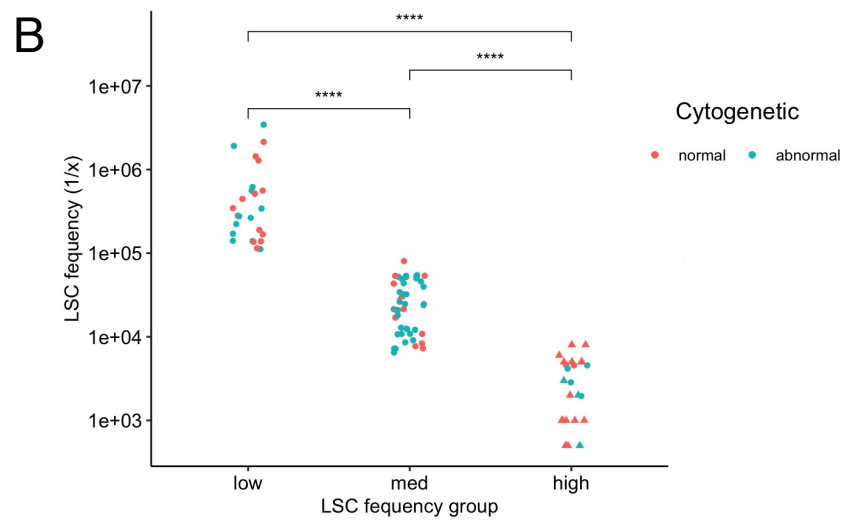

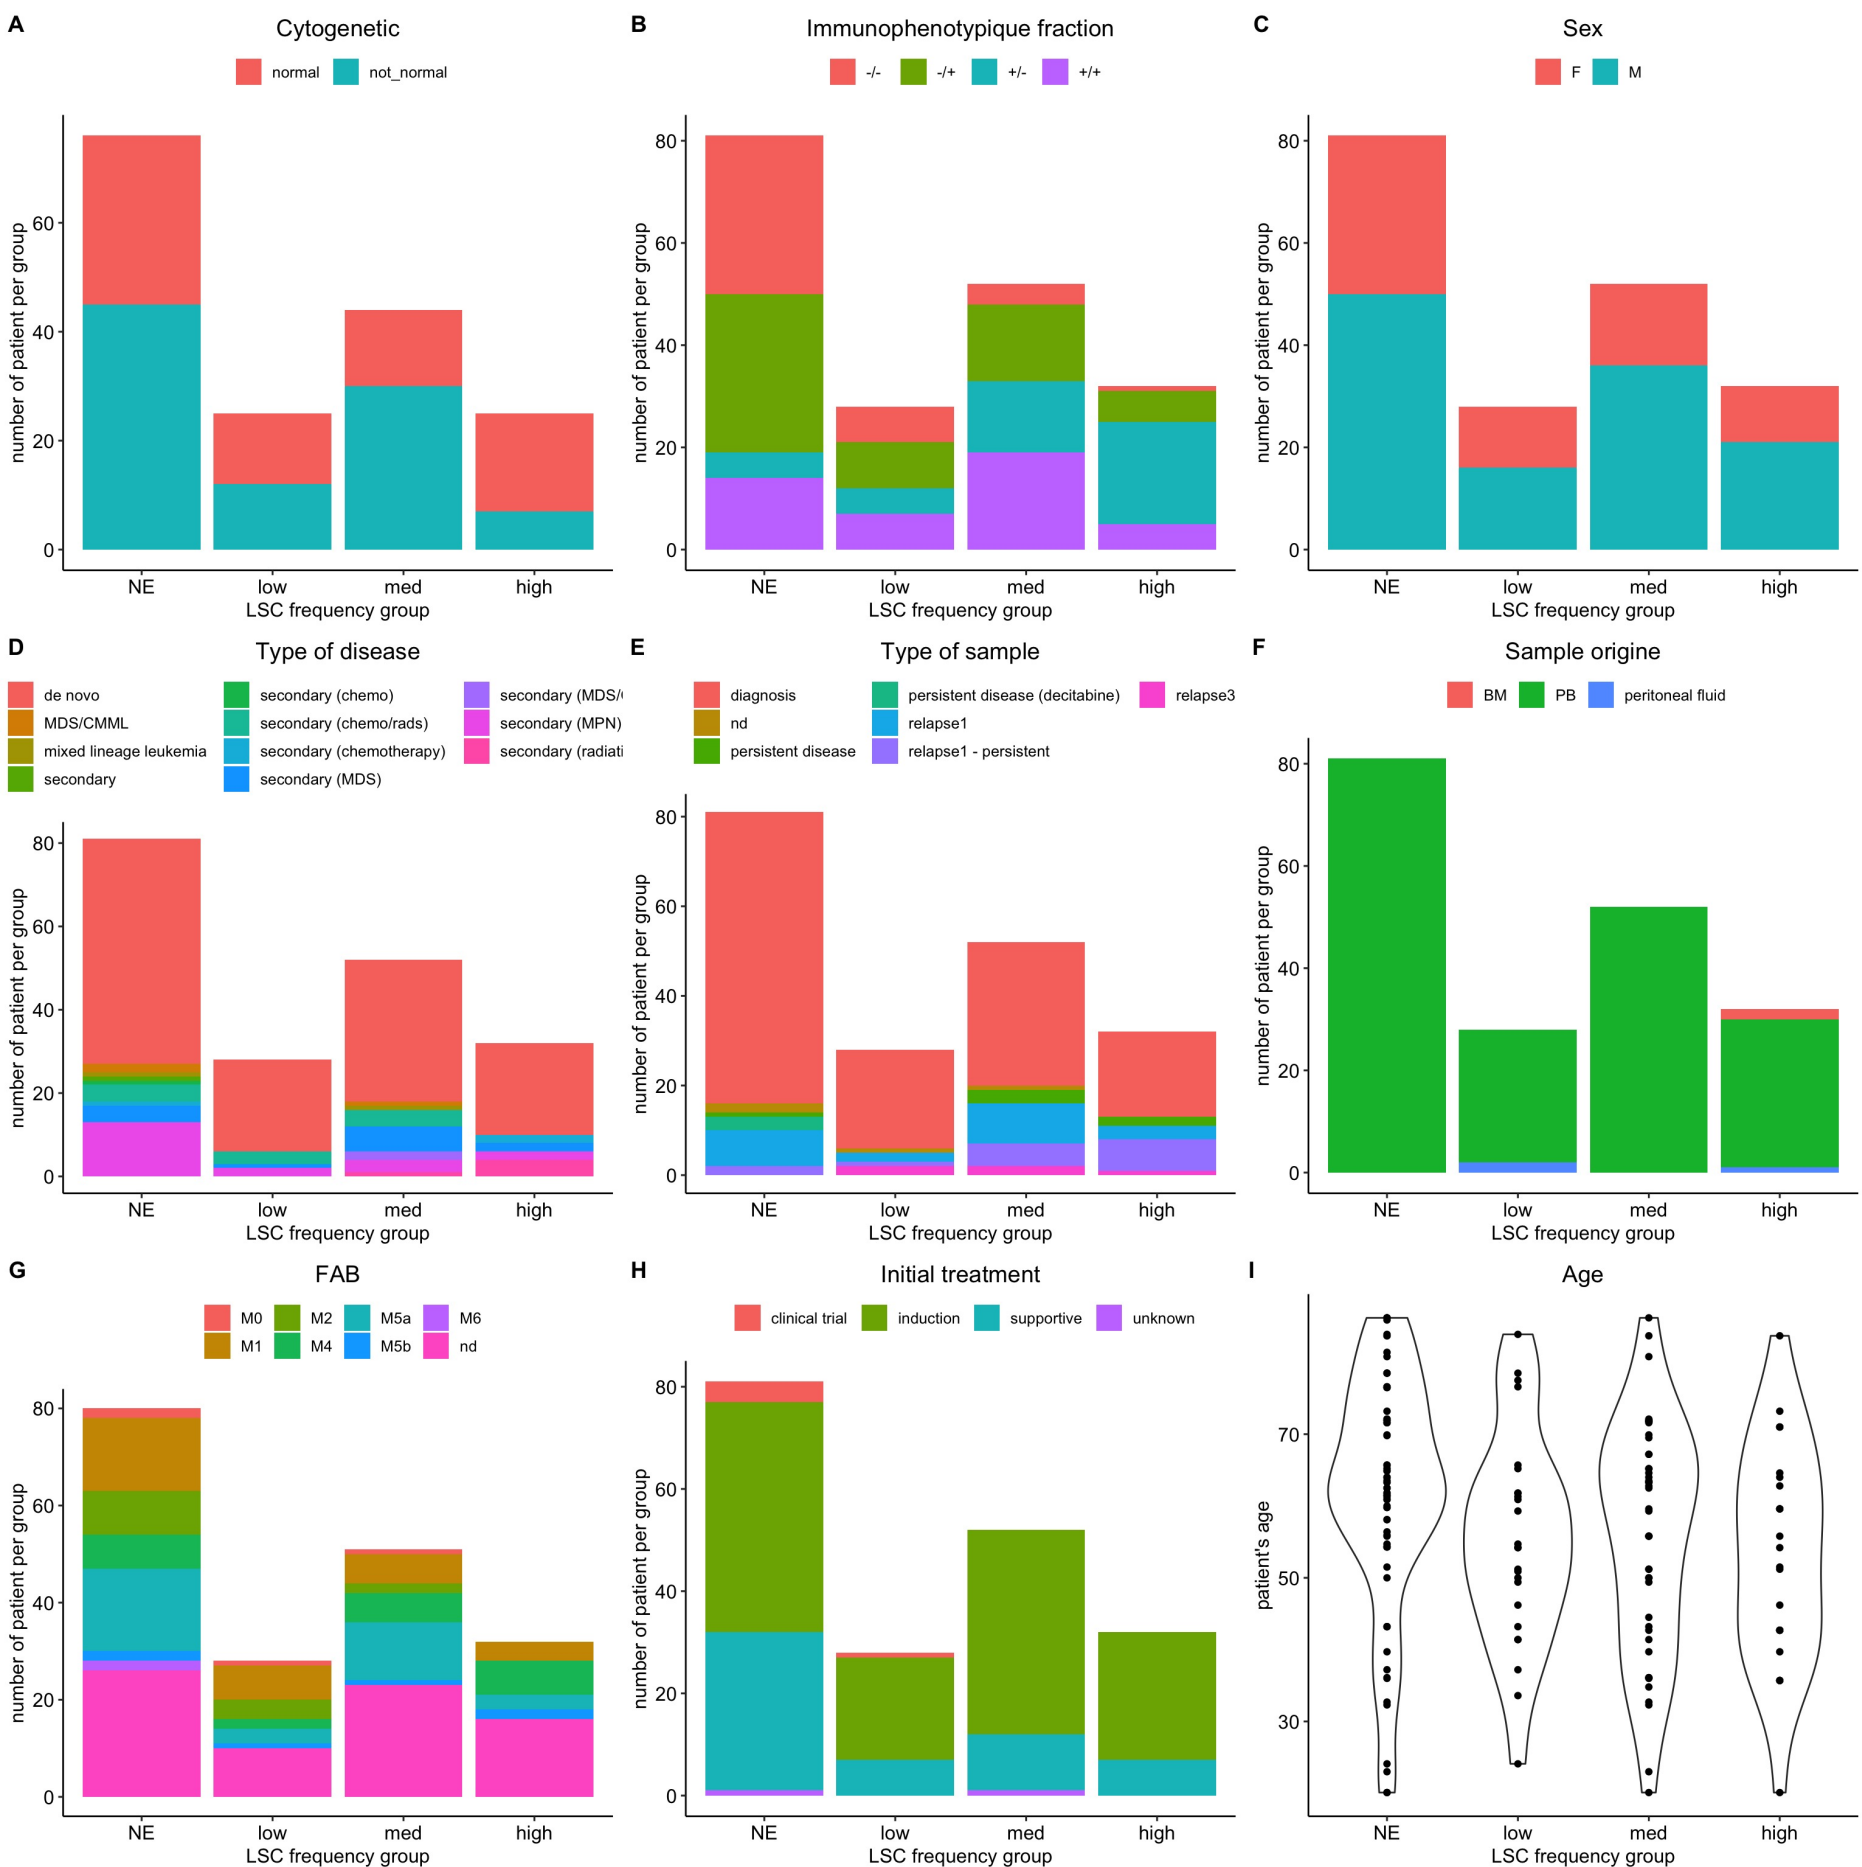

**A****ATF4 target genes**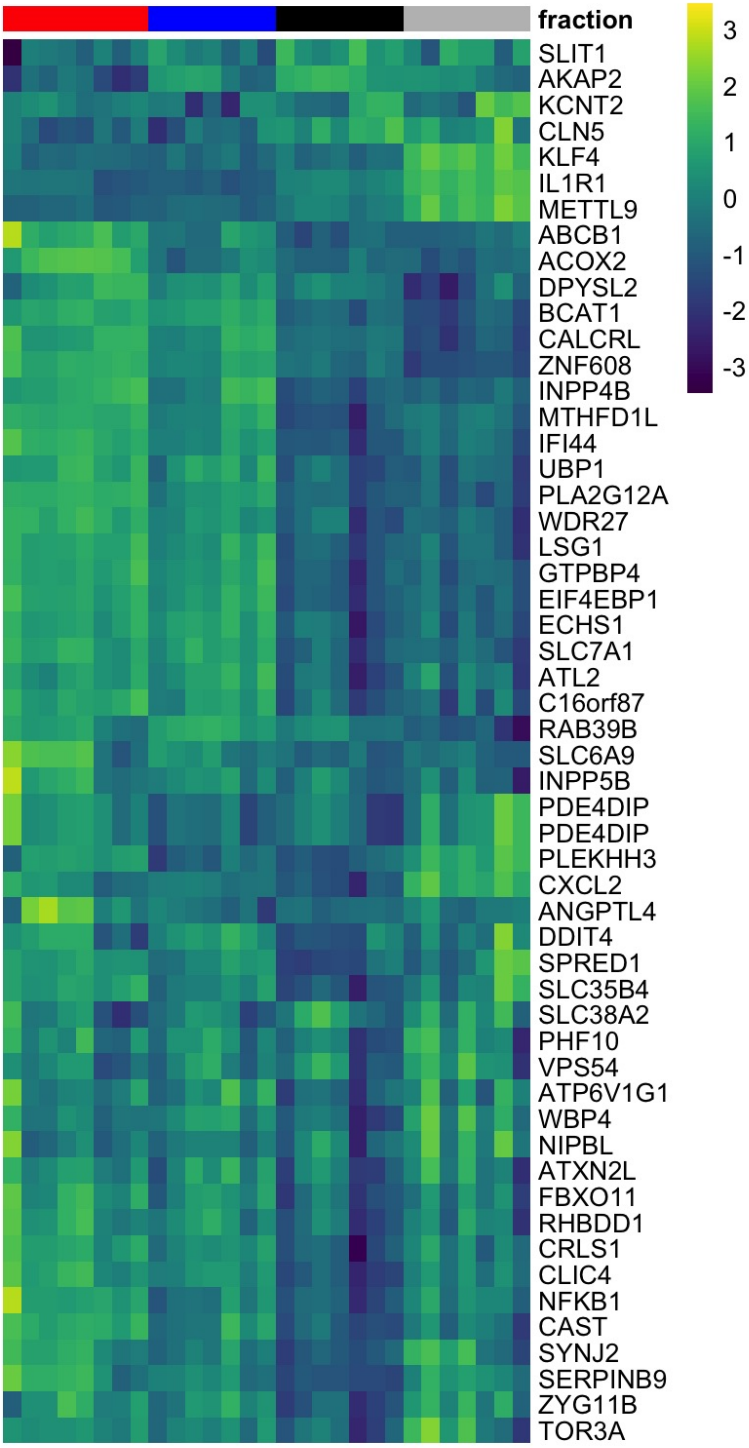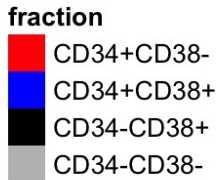**B**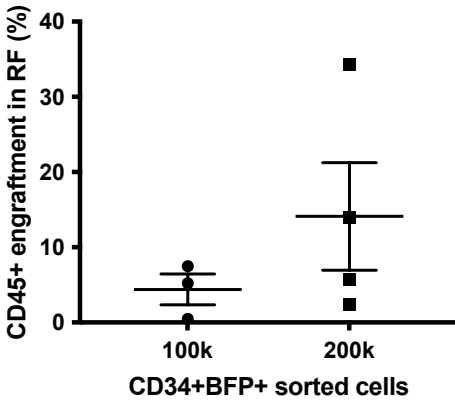**C**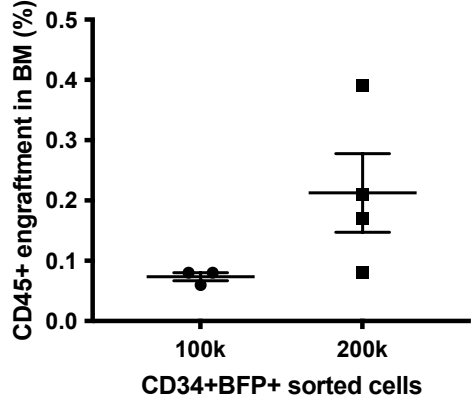**D**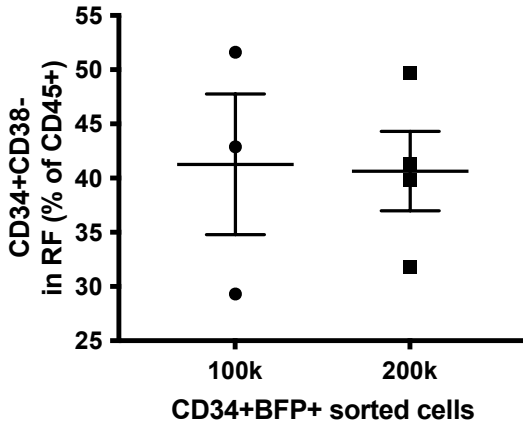**E**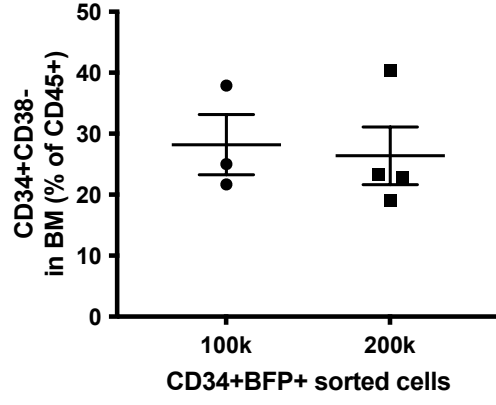**F**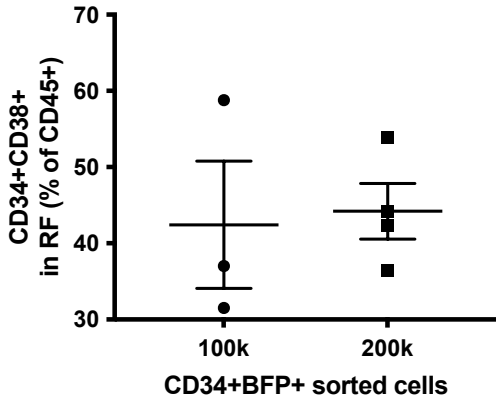**G**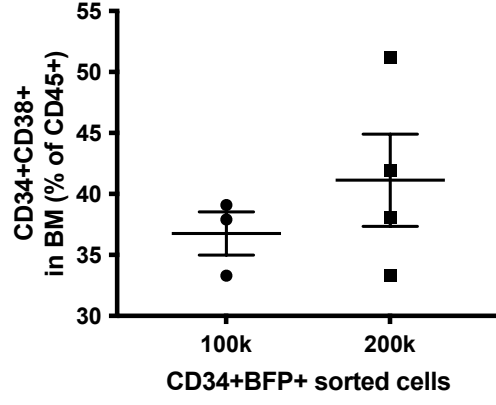

days\_after\_electroporation d3 d7 d11

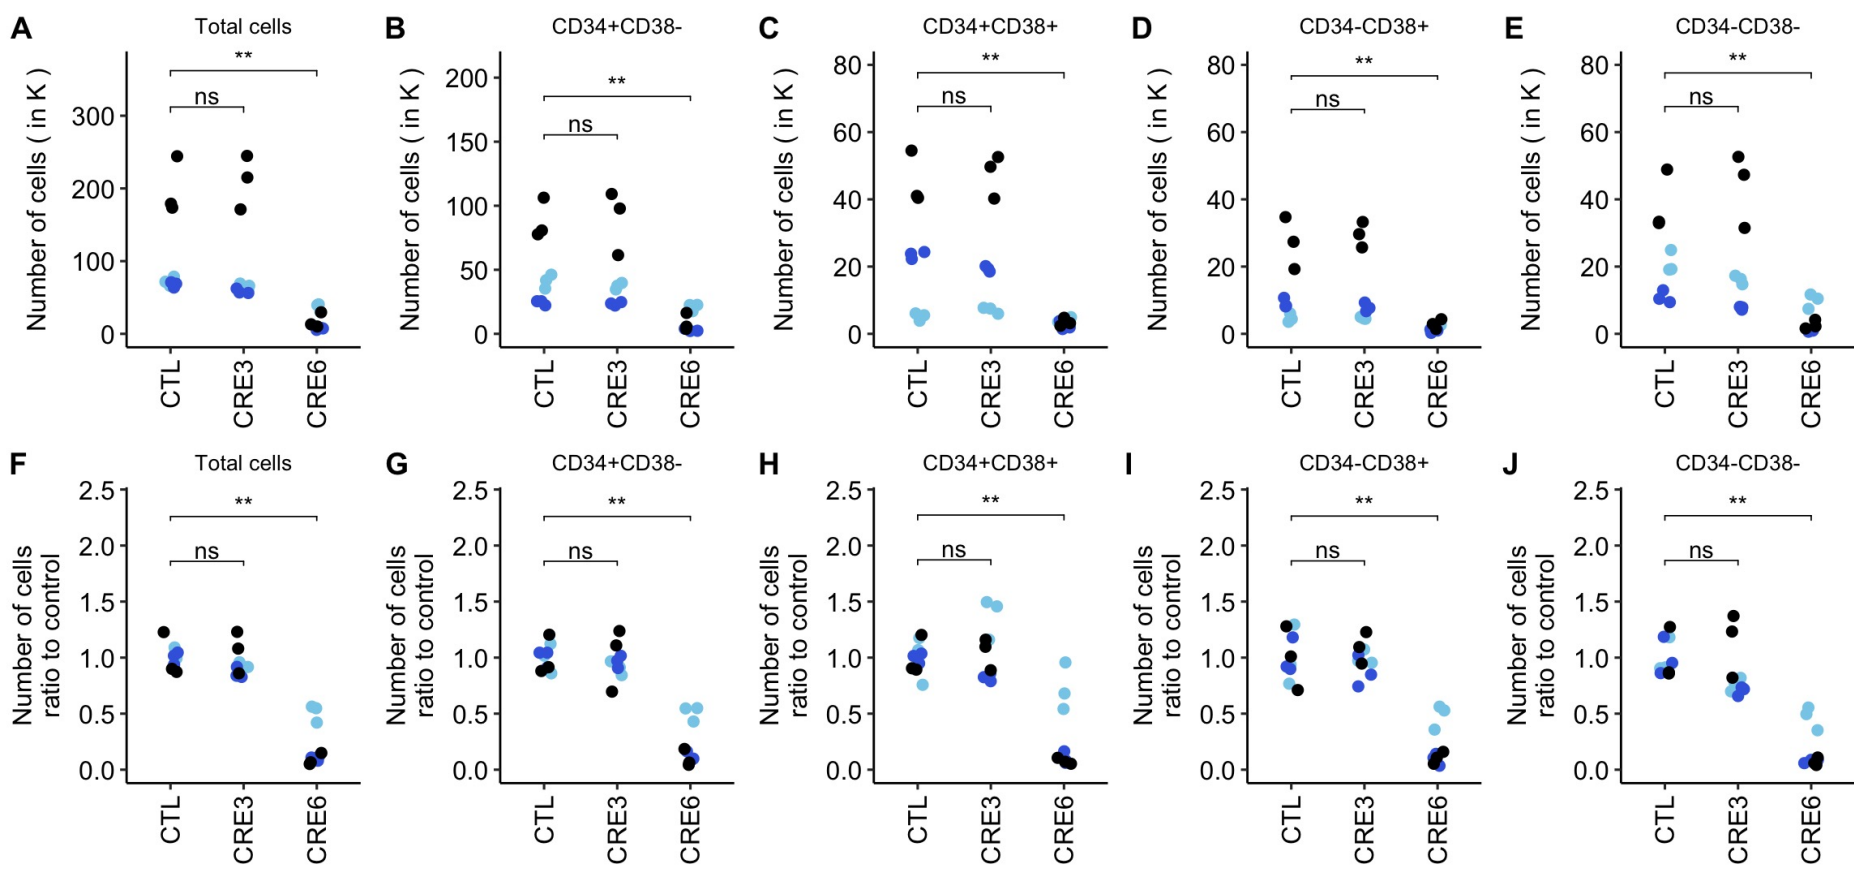

Supplement: 41375_2022_1697_MOESM1_ESM.pdf [file 41375_2022_1697_MOESM1_ESM.pdf]
